# Nanoscale distribution of nuclear sites analyzed by superresolution STED-ICCS

*M. Oneto, L. Scipioni, M.J. Sarmiento, I. Cainero, S. Pelicci, L. Furia, P.G. Pelicci, G.I. Dellino, P. Bianchini, M. Faretta, E. Gratton, A. Diaspro, L. Lanzanò*

KEYWORDS: image cross-correlation spectroscopy (ICCS) – Stimulated Emission Depletion (STED) – super-resolution – nuclear sites – replication – transcription – colocalization – local ICCS

## 2 **Abstract**

3 Deciphering the spatiotemporal coordination between nuclear functions is important to  
4 understand its role in the maintenance of human genome. In this context, superresolution  
5 microscopy has gained considerable interest as it can be used to probe the spatial organization of  
6 functional sites in intact single cell nuclei in the 20-250 nm range. Among the methods that quantify  
7 colocalization from multicolor images, image cross-correlation spectroscopy (ICCS) offers several  
8 advantages, namely it does not require a pre-segmentation of the image into objects and can be used  
9 to detect dynamic interactions. However, the combination of ICCS with super-resolution  
10 microscopy has not been explored yet.

11 Here we combine dual color stimulated emission depletion (STED) nanoscopy with ICCS  
12 (STED-ICCS) to quantify the nanoscale distribution of functional nuclear sites. We show that  
13 STED-ICCS provides not only a value of colocalized fraction but also the characteristic  
14 distances associated to correlated nuclear sites. As a validation, we quantify the nanoscale spatial  
15 distribution of three different pairs of functional nuclear sites in MCF10A cells. As expected,  
16 transcription foci and a transcriptionally repressive histone marker (H3K9me3) are not  
17 correlated. Conversely, nascent DNA replication foci and the Proliferating cell nuclear antigen  
18 (PCNA) protein have a high level of proximity and are correlated at a nanometer distance which  
19 is close to the limit of our experimental approach. Finally, transcription foci are found at a  
20 distance of 130 nm from replication foci, indicating a spatial segregation at the nanoscale.  
21 Overall, our data demonstrate that STED-ICCS can be a powerful tool for the analysis of nanoscale  
22 distribution of functional sites in the nucleus.

## 23 **Statement of significance**

24 Several methods are available to quantify the proximity of two labeled molecules from dual color  
25 images. Among them, image cross-correlation spectroscopy (ICCS) is attractive as it does not  
26 require a pre-segmentation of the image into objects and can be used to detect dynamic interactions.

27 Here, we combine for the first time ICCS with superresolution stimulated emission depletion  
28 (STED) microscopy (STED-ICCS) to quantify the spatial distribution of functional sites in the  
29 nucleus. Our results show that STED-ICCS, in addition to quantifying the colocalized fraction,  
30 detects characteristic nanometer distances associated to correlated nuclear sites. This work shows  
31 that STED-ICCS can be a powerful tool to quantify the nanoscale distribution of functional sites in  
32 the nucleus.

33

## 34 **Introduction**

35 Healthy genome regulation and maintenance rely on the proper spatiotemporal coordination  
36 between several nuclear functions. Alterations in chromatin organization are often linked to human  
37 diseases (1). An example is represented by DNA transcription and replication, two fundamental  
38 genomic processes that can potentially compete for the same DNA template. Replication and  
39 transcription both occur within the highly packed chromatin environment and must be tightly  
40 coordinated in time and space to avoid interference and generation of DNA damage (2). Alterations  
41 in the coordination of replication and transcription represent a major source of genomic instability,  
42 a hallmark of cancer (3). Therefore, deciphering the coordination between nuclear functions at a  
43 high spatial and temporal resolution is important to understand its role in health and disease.  
44 Genome-scale sequencing methods provide high-resolution maps of spatiotemporal regulation of  
45 genomic processes (4, 5). However, they do not provide any information on spatial localization and  
46 lack single cell resolution. In this context, optical imaging methods are emerging as complementary  
47 tools to investigate genome organization and structure in intact single cell nuclei (6).

48 The simplest approach to study spatial organization of two labeled molecules consists in the  
49 analysis of dual color images for the presence of colocalized signal, i.e. signal that overlaps within  
50 the two detection channels. Colocalization is a measurement of the co-distribution of two probes at  
51 a spatial scale defined by the resolution of the optical microscope. In conventional optical  
52 microscopy, this spatial scale is limited by diffraction to about 250 nm. For this reason, alternative  
53 strategies have been developed to investigate cellular processes at the nanoscale. For instance, a  
54 popular method to probe molecular distances in the nanometer range is Forster Resonance Energy  
55 Transfer (FRET) (7-9) but, unfortunately, FRET is not sensitive when distances are larger than  
56 about 10 nm. Similarly, *in situ* Proximity Ligation Assay (PLA) is a powerful method to visualize  
57 proximity of two labeled species but its sensitivity does not exceed 40 nm (10, 11). This scenario  
58 changed dramatically with the introduction of superresolution microscopy (also called nanoscopy),

59 namely the ensemble of microscopy techniques providing optical resolution below the diffraction  
60 limit (12). For instance, in single molecule localization microscopy (SMLM), the fluorophores are  
61 sequentially switched on and off and localized with high precision on each frame, resulting in  
62 images with a resolution down to ~20 nm (13-15). In stimulated emission depletion (STED)  
63 microscopy the fluorophores are selectively switched off at the periphery of the diffraction-limited  
64 detection spot by a second, doughnut-shaped laser beam, producing an immediate improvement of  
65 spatial resolution down to ~50 nm (16). Thus, superresolution can be used to probe spatial  
66 organization in the 20-250 nm range, which corresponds to the range of higher order organization of  
67 chromatin in the nucleus. This nanoscale spatial organization can be studied in a 'static' way, from  
68 images of fixed cells or in a 'dynamic' way, from acquisition of superresolution data in live cells.

69 Methods that provide a quantitative measure of colocalization from static multicolor  
70 superresolution images can be divided in two major groups: object-based methods, which perform a  
71 segmentation of the image into objects prior to analyzing their relative spatial distributions, and  
72 pixel-based methods, which extract correlation coefficients from pixel intensities (17, 18). In  
73 general, object-based analysis can be performed on any type of superresolution image as long as the  
74 target objects are well resolved and identified. In particular, object-based methods are often the  
75 methods of choice in SMLM, where the acquired data are already segmented into a list of x y  
76 coordinates of individual molecules (19-23). In principle, object-based analysis provides a full  
77 description of the spatial distribution of the two labeled species: in fact, knowledge of the objects  
78 coordinates allows (i) mapping the locations of the specimen with a higher level of proximity  
79 and (ii) performing a statistical analysis of the relative distance between the particles. On the  
80 other hand, a great advantage of pixel-based methods is that they do not require a pre-segmentation  
81 of the images into objects but rely on the calculation of coefficients from the pixel intensity values  
82 (24, 25). Pixel-based methods are routinely applied to quantify spatial distribution in multicolor  
83 superresolution images (26-28).

84 A method to study interactions in a ‘dynamic’ way is Fluorescence Cross-Correlation  
85 Spectroscopy (FCCS), the dual channel version of Fluorescence Correlation Spectroscopy (FCS)  
86 (29). In FCCS, the fraction of interacting particles is extracted from the analysis of temporal  
87 intensity fluctuations originating from changes in fluorophore concentration within a small  
88 observation volume, typically defined by the focal spot of a confocal microscope (30, 31). Both  
89 FCS and FCCS have been applied to study the mobility and interactions of molecules in the nucleus  
90 (32-34). Interestingly, the very same formalism of FCS and FCCS can be applied to the analysis of  
91 the spatial intensity fluctuations found in images. Image Correlation Spectroscopy (ICS) and Image  
92 Cross-Correlation Spectroscopy (ICCS) are the spatial variants of FCS and FCCS, respectively  
93 (35). Notably, ICCS can be used as a pixel-based method to analyze the spatial distribution in static  
94 images as well (36). Thus, ICCS appears as an extremely versatile method that can offer several  
95 advantages compared to other analysis approaches, namely it does not require a pre-segmentation of  
96 the image into objects and can be used to detect dynamic interactions (37-39). However, despite this  
97 potential, the combination of ICCS with superresolution microscopy has not been fully explored  
98 yet.

99 Here, we show that the combination of dual color STED nanoscopy with ICCS (STED-ICCS)  
100 can be used to quantify the relative nanoscale spatial distribution of distinct nuclear foci. In  
101 particular, we show that STED-ICCS can provide, to some extent, some of the attractive features  
102 of an object-based analysis but without requiring a pre-segmentation of the super-resolved  
103 image. In fact, we are able to (i) map the locations within nuclei with a higher level of proximity  
104 and (ii) determine if the particles are correlated at a certain nanoscale distance. First, the analysis  
105 is tested on simulated images of nuclear foci at variable density and compared with an object-  
106 based analysis performed on the same simulated datasets. Then, the STED-ICCS analysis is  
107 tested on dual color STED images of model samples based on DNA origami bearing green and  
108 red fluorophores located at a characteristic distance of 20 nm or 100 nm. These data demonstrate

109 that STED-ICCS can provide nanoscale information on the distance between correlated particles.  
110 Finally, to validate the STED-ICCS method on a biological sample, we quantify the relative  
111 nanoscale spatial distribution of three different pairs of nuclear sites in MCF10A cells. As  
112 expected, transcription foci and a transcriptionally repressive histone marker (H3K9me3) show  
113 the minimum level of colocalization and random relative distance distribution. Conversely,  
114 nascent DNA replication foci and the Proliferating cell nuclear antigen (PCNA) protein have a  
115 high level of proximity and are correlated at a nanometer distance which is close to the limit of  
116 our experimental approach. Notably, nascent DNA replication foci and transcription foci are  
117 found to be partially correlated but at a distance of ~100 nm, indicating that the two functional  
118 sites are spatially segregated at the nanoscale. Overall, these data demonstrate that STED-ICCS can  
119 be a powerful tool for the analysis of relative nanoscale spatial distribution of functional sites in the  
120 nucleus.

121

## 122 **Results**

### 123 **Simulations: STED-ICCS is a robust method to characterize relative spatial distribution at** 124 **high densities of foci**

125 To compare STED-ICCS with object-based analysis, we simulated dual color images of nuclear  
126 foci at variable densities (Fig.1). In each channel, the nuclear foci were simulated as  $N$  point-like  
127 particles distributed in a 16  $\mu\text{m}$  wide circular region (40) and convoluted with a Gaussian Point  
128 Spread Function (PSF) with a Full Width Half Maximum (FWHM) of 3 pixels, corresponding to  
129 120 nm. We simulated distributions of foci randomly distributed in each channel (uncorrelated),  
130 with a fraction  $f_{\text{coloc}}=0.25$  of foci colocalizing in the two channels (colocalized) and with a  
131 fraction  $f_{\text{coloc}}=0.25$  of foci colocalizing only in a specific sub-portion of the image (colocalized in  
132 a zone). The total number of foci in each channel was varied from  $N=100$  to  $N=10000$ . These

133 simulations are intended to test the analysis workflow and not as a model of the more complex  
134 distributions and patterns that can be found in real samples.

135 At low density, the foci are easily localized in the XY plane and the relative distance between  
136 every center in one channel and every center in the other channel, can be calculated from their  
137 center positions (Fig. 1a) according to the localization-based approach. The resulting relative  
138 distance distribution (RDD) has a linearly growing trend for the uncorrelated sample, as  
139 expected from purely geometrical considerations (Fig.1b). For the other two samples in Fig.1a  
140 (colocalized and colocalized in a zone), the RDD shows an additional peak at a distance zero,  
141 corresponding to the fraction of colocalized foci, superimposed with the linear trend due to the  
142 random distribution (Fig.1b). At higher densities of foci (Fig.1c), the colocalized fraction  
143 retrieved with the object-based analysis (Fig.1f, triangles) deviates from the simulated value  
144 ( $f_{\text{coloc}}=0.25$ ). In particular, a deviation of 20% from the expected value is obtained when the  
145 number of foci is  $N=500$  (Fig.1f). For comparison, considering a FWHM value typical of  
146 diffraction-limited microscopy,  $\text{FWHM}_{\text{conf}}=250$  nm, a deviation of 20% is obtained already when  
147 the number of foci is  $N=115$ . This is due to the lower accuracy in determining the center  
148 positions of the foci during the segmentation process.

149 On the other hand, ICCS is able to determine the colocalized fraction independently of the  
150 density of foci (Fig.1g). In ICCS, the colocalized fraction  $f_{\text{ICCS}}$  is extracted from the fitting of the  
151 image auto- and cross-correlation functions (41, 42). The amplitude of the cross-correlation  
152 function is zero for the uncorrelated sample (Fig.1d, top), whilst is positive for both colocalized  
153 samples (Fig.1d, mid and bottom). In the range of foci densities explored here, the value of  
154 colocalized fraction retrieved by ICCS is consistent with the simulated value (Fig.1g), in keeping  
155 with previous studies (36). Thus, STED-ICCS can be used to determine the fraction of cross-  
156 correlated particles also when the density of foci is too high for non-super-resolved methods or,  
157 equivalently, when the improvement of spatial resolution is not sufficient to resolve the foci.



158 An apparent disadvantage of ICCS, in comparison with object-based approaches, is that it  
159 provides only an average description of the properties of the sample in the region analyzed. In  
160 fact, the two correlated samples shown in Fig.1c (colocalized and colocalized in a zone) produce  
161 almost identical correlation functions (Fig.1d) despite a very different colocalization pattern.  
162 Thus, ICCS can be used to extract a value of the colocalized fraction at high density of foci but  
163 does not specify where the foci are colocalized. To partially overcome this limitation, we  
164 performed local ICCS analysis, i.e. ICCS performed on small sub-regions of the image  
165 (Fig.1e,h). It has been previously shown that, if the spatial correlation function is calculated  
166 locally, one can get maps of physical parameters such as protein velocity (43), particle size (44)  
167 or diffusion coefficient of a probe (45, 46). Local ICCS can be used to generate a map of the  
168 value of the colocalized fraction extracted by fitting the local auto- and cross-correlation  
169 functions (Fig.1e). The local ICCS maps show that the two correlated samples (colocalized and  
170 colocalized in a zone) have a very different pattern, despite containing the same total fraction of  
171 colocalized foci. The spatial resolution of the local ICCS map depends on the size of the sub-  
172 image employed for the local analysis. For instance, in the example of Fig.1e, the size of the sub-  
173 image was set to 69 pixels.

#### 174 **Measurements on model systems: STED-ICCS detects particles correlated at a distance.**

175 Another limitation of STED-ICCS, when compared to object-based analysis, is that it cannot be  
176 used to perform a complete statistical analysis of the relative distance between the particles. This  
177 feature of object-based analysis is particularly useful to detect characteristic nanometer distances  
178 associated to inter-molecular complexes (20). Here we aim to show that, even if it is not able to  
179 provide a full statistical analysis, STED-ICCS can provide information on the average distance  
180 between correlated particles.

181 In STED-ICCS, the shape of the cross-correlation function is dependent upon the distance  $d$   
182 between the two probes and the effective spatial resolution of the STED microscope in the two

183 channels. For two single spots located at distance  $d$  along a given direction, if the single channel  
184 2D auto-correlation functions have width  $w_{11}$  and  $w_{22}$ , the corresponding 2D cross-correlation  
185 function has a width equal to  $w_{cc} = ((w_{11}^2 + w_{22}^2)/2)^{1/2}$  and is shifted from the origin of an amount  $d$   
186 along the same direction (47). In most real cases, however, the particles are found at all possible  
187 orientations with respect to each other. This has two effects on the cross-correlation function,  
188 namely a reduction of its amplitude and an increase of the value of its width compared to the  
189 value  $w_{cc}$ , expected for perfectly coaligned spots. The broadening of the cross-correlation  
190 function can be evaluated as  $\Delta w = w_{12} - w_{cc}$ . Importantly,  $\Delta w$  is a parameter sensitive only to the  
191 average distance between correlated particles, whilst the amplitude-related parameter  $f_{ICCS}$  is  
192 sensitive also to the relative amount of correlated particles. Thus, the  $\Delta w$  can be used to estimate  
193 the distance associated to the correlated particles. To actually convert values of  $\Delta w$  into values of  
194 distance, we performed simulations of particles correlated at variable distances and measured the  
195 broadening of the cross-correlation function (Supplementary Fig. S1).

196 To demonstrate this effect, we performed STED-ICCS on optical nanorulers, i.e. DNA origami  
197 structures designed to contain the same two fluorophores used in our experiments (Chromeo-488  
198 and Atto-532) at a well-defined distance of either  $d=20\text{nm}$  or  $d=100$  (Fig.2a,b). First, we  
199 characterized the samples by object-based analysis. The spatial resolution achieved in these  
200 STED images was  $\sim 95$  nm in the green channel, and  $\sim 130$  nm in the red channel, as determined  
201 from the FWHM of line profiles (Supplementary Fig. S2). Considering an average number of  
202 photons detected per spot per channel  $N \sim 30$  and a 10% background noise level, this translates to  
203 an estimated localization precision  $\sigma_G \sim 13$  nm and  $\sigma_R \sim 20$  nm in the green and red channels,  
204 respectively (48). This propagates to an expected uncertainty  $(\sigma_G^2 + \sigma_R^2)^{1/2} \sim 24$  nm in the  
205 estimation of the relative distance  $d$ . The distributions of distances obtained from the object-  
206 based analysis of STED images of optical nanorulers are reported in (Fig.2c,d). They contain a  
207 peak superimposed to a linear growing component. The distance peak value found in the relative

208 distance distribution (RDD) of the 100-nm nanorulers was  $d_{100\text{nm}}=100\pm 25$  nm (mean $\pm$ s.d.), in  
209 keeping with the expected value. These data indicate that, at the imaging conditions of this  
210 sample, we can measure distances with an accuracy  $\sigma_d\sim 25$  nm. This sets a lower limit to the  
211 distances that can be detected with our experimental setup. In line with this, the distance peak  
212 value found in the RDD of the 20-nm nanorulers was  $d_{20\text{nm}}=40\pm 30$  nm.

213 Then we performed STED-ICCS on the same samples. As expected, STED-ICCS detected a  
214 positive cross-correlation for both samples (Fig.2e,f), with the colocalized fraction being higher  
215 in the 20-nm nanorulers ( $f_{\text{ICCS}}=1.04\pm 0.3$ , mean $\pm$ s.d.) than in the 100-nm nanorulers  
216 ( $f_{\text{ICCS}}=0.66\pm 0.11$ , mean $\pm$ s.d.) (Fig.2g). More interestingly, the parameter  $\Delta w$ , related to the  
217 broadening of the cross-correlation function (Fig.2h), was higher in the 100-nm nanorulers  
218 ( $\Delta w=1.2\pm 0.2$  pixels, mean $\pm$ s.d.) than in the 20-nm ones ( $\Delta w=0.15\pm 0.04$  pixels, mean $\pm$ s.d.).  
219 According to the simulations, the measured values of  $\Delta w$  correspond to the distance values  
220  $d_{\text{ICCS}}=99\pm 8$  nm, for the 100-nm nanorulers, and  $d_{\text{ICCS}}=35\pm 5$  nm, for the 20-nm nanorulers, which  
221 are in agreement with the peak values found with object-based analysis (Fig.2i). Note that the  
222 smaller uncertainty in the value of  $d_{\text{ICCS}}$  is due to the fact that each STED-ICCS measurement is  
223 performed on an image containing several tens of nanorulers whilst, in the object-based analysis,  
224 the distance is measured on each identified pair of objects.

225 Thus, the relative broadening of the STED-ICCS cross-correlation function can provide  
226 nanoscale information on the distance between particles that are not distributed randomly.

## 227 **Measurements in cell nuclei: STED-ICCS quantifies the relative nanoscale distribution of** 228 **functional nuclear sites**

229 As validation of our STED-ICCS method, we characterized the nanoscale spatial distribution of  
230 three different pairs of functional nuclear sites in the diploid mammary epithelium cells MCF10A.  
231 We compared the nanoscale spatial distribution of i) transcription foci (labeled through  
232 incorporation of the nucleotide analogue BrU) *versus* a transcriptionally repressive histone marker

233 (H3K9me3) (Fig.3a), ii) nascent DNA replication foci (labeled through incorporation of the  
234 nucleotide analogue EdU) *versus* the replication machinery protein proliferating cell nuclear antigen  
235 (PCNA), during early S phase (Fig.3b), iii) transcription foci (BrU) *versus* nascent DNA replication  
236 foci (EdU), during early S phase (Fig.3c). The STED-ICCS analysis was compared with an object-  
237 based analysis performed on the same dataset.

238 Representative dual color STED images of the three samples are reported in Fig.3. For each image  
239 are shown the map of localized spots along with the calculated RDD, the image auto- and cross-  
240 correlation functions and the map of the colocalized fraction obtained by local ICCS (Fig.3).  
241 Overall, there was an agreement between the colocalized fraction extracted by the object-based  
242 analysis,  $f_{obj}$ , and that extracted by STED-ICCS,  $f_{ICCS}$ , for the different samples (Supplementary  
243 Fig. S3). Differences in the absolute values ( $f_{ICCS}$  was systematically higher than  $f_{obj}$ ) are probably  
244 related to the specific settings of each analysis. For instance, in the object-based analysis, an  
245 intensity threshold value was set manually for each image whilst, in the ICCS analysis, we did not  
246 perform any background subtraction. Notably, the local ICCS maps can be used to visualize, in  
247 STED-ICCS, the regions of the nuclei with a higher level of proximity, similarly to what can be  
248 done with object-based analysis (Fig.3). The average co-localization fractions retrieved from the  
249 STED-ICCS analysis are reported in Fig.4c. Transcription foci and the transcriptionally repressive  
250 histone marker H3K9me3 show the minimum level of colocalization ( $f_{ICCS}=0.02\pm 0.05$ , mean $\pm$ s.d.,  
251 n=17 cells), in keeping with the evidence that H3K9me3 is an epigenetic marker of repressive  
252 heterochromatin, replicating during late-S phase and not associated with active transcription (49).  
253 This result is confirmed by object-based analysis, where transcription and H3K9me3 show a  
254 random-like RDD (Fig.4a,b). Conversely, DNA replication foci and the PCNA protein have the  
255 maximum level of colocalization ( $f_{ICCS}=1.01\pm 0.16$ , mean $\pm$ s.d., n=19 cells), in agreement with the  
256 role of the PCNA protein in orchestrating the replication process (50). Transcription foci and DNA  
257 replication foci in early-S phase cells exhibit an intermediate level of colocalization

258 ( $f_{ICCS}=0.36\pm 0.09$ , mean $\pm$ s.d., n=22 cells). However, this analysis does not show if this difference in  
259 the level of colocalization is due to a different distribution at the nanoscale.

260 To get insight on the relative nanoscale distribution of the correlated functional sites, we analyzed  
261 the broadening of the cross-correlation function,  $\Delta w$  (Fig.4d), and compared it with the relative  
262 distance distribution (RDD) derived from the object-based analysis (Fig.4a,b). The RDD of DNA  
263 replication foci and the PCNA protein revealed a peak distance of 55 nm ( $d_{PCNA-EdU}=55\pm 34$  nm,  
264 mean $\pm$ s.d., n=19 cells). STED-ICCS detected a broadening  $\Delta w_{PCNA-EdU}=0.4\pm 0.4$  pixels  
265 (mean $\pm$ s.d., n=19 cells) corresponding to a distance value  $d_{PCNA-EdU}=58\pm 40$  nm. The values of  
266 distance detected by the two methods are very close to the limit of our experimental approach, as  
267 determined with the 20-nm optical nanorulers ( $d_{obj}=40$  nm and  $d_{ICCS}=35$ nm). A higher level of  
268 inaccuracy might also come from the use of primary and secondary antibodies. Moreover, we  
269 analyzed only single optical sections that represent only a projection of the distribution of  
270 nuclear foci in three dimensions. This could result in underestimation of the recovered distance  
271 values. Besides these technical considerations, we should also take into account that the EdU  
272 signal labels the DNA sequences that were replicating during the previous 20 minutes and that  
273 PCNA, not only tethers polymerases to DNA for during replication, but also participates in non-  
274 replicative DNA synthesis events, such as those occurring during DNA repair, and other cell  
275 functions that extend well beyond DNA synthesis.

276 The RDD of transcription and DNA replication foci in early-S phase cells exhibited a quasi-random  
277 relative distance distribution (Fig.4b). After subtraction of the random component, the RDD showed  
278 a small peak indicating a positive correlation at a distance of  $d_{BrU-EdU}=100\pm 50$  nm (mean $\pm$ s.d.,  
279 n=22 cells) (Fig.4b). Interestingly, STED-ICCS detected a broadening  $\Delta w_{BrU-EdU}=2.3\pm 1.0$  pixels  
280 (mean $\pm$ s.d., n=22 cells) corresponding to a distance value  $d_{BrU-EdU}=138\pm 35$  nm (Fig.4b,d,e).  
281 Thus, STED-ICCS was able to reveal a correlation between these nuclear sites in the ~100-nm  
282 range, similarly to the object-based analysis. The non-random distribution in the BrU-EdU sample

283 is consistent with the cell population which was analyzed; during early-S phase, replicating DNA is  
284 mainly euchromatic and gene-rich. Most of the genes contained within these regions are generally  
285 expressed during early S-phase, and importantly, although their transcription is time-controlled in  
286 order to avoid transcription-replication clashes, it is still very close to ongoing replication, not only  
287 in space, but also in time, both prior and after DNA synthesis. Thus, in early-S phase, transcription  
288 and replication operate on the same portion of the genome, thus explaining proximity of the  
289 corresponding BrU and EdU signals (51). In summary, STED-ICCS detected a small but positive  
290 correlation between replication and transcription (quantified by the parameter  $f_{ICCS}$ ) but indicated  
291 spatial segregation at the nanoscale (quantified by the parameter  $d_{ICCS}$ ), in keeping with a long-  
292 standing model of genome organization suggesting spatial segregation between replication and  
293 transcription (2, 51).

## 294 **Discussion**

295 In this work, we have explored the use of super-resolution STED imaging, combined with image  
296 cross-correlation spectroscopy (ICCS), to investigate the relative nanoscale spatial distribution of  
297 nuclear foci. There are three main technical points that characterize STED-ICCS. The first  
298 important aspect is that, being based on the calculation and fit of the image spatial correlation  
299 functions, STED-ICCS does not require a pre-segmentation of the images into objects. To  
300 illustrate the consequences of this point, we have performed ICCS and object-based analysis on  
301 simulated data of point-like particles at different density/spatial resolution. These simulations  
302 indicated that ICCS could be applied even at high densities of foci, whilst the object-based  
303 analysis was affected by a decreasing accuracy in the pre-segmentation process when the spatial  
304 resolution was not sufficient to resolve the foci. A second technical aspect is that in STED-ICCS  
305 the colocalized fraction is estimated from the amplitude of the image cross- and auto-correlation  
306 functions, calculated over the image. Compared to object-based analysis, this calculation does  
307 not specify where the foci are colocalized. In this respect, we have shown that a local STED-

308 ICCS analysis can be used to map the value of the colocalization coefficient across the sample  
309 and partially compensate for this limitation. The third important aspect is related to the detection  
310 of characteristic correlation distances. In the object-based approaches, it is possible to perform a  
311 complete statistical analysis of the relative distance between the particles and detect  
312 characteristic nanometer distances associated to inter-molecular complexes (20). In this respect,  
313 we have shown that the broadening of cross-correlation function in STED-ICCS can also provide  
314 quantitative information on the nanoscale distance between correlated particles.

315 To validate our approach, we performed STED-ICCS on dual color STED images of model and  
316 biological samples and compared the results with an object-based analysis performed on the  
317 same datasets. In particular, the object-based quantification was presented in terms of a relative  
318 distance distribution (RDD), representing the histogram the distance values between particles.  
319 However, we expect that any other type of quantitative analysis applied to the list of coordinates  
320 of the positions of the foci, such as radial distribution functions or Ripley's functions (20, 21),  
321 would give similar results. We quantified by STED-ICCS the relative nanoscale distribution of  
322 three pairs of functional nuclear sites. Notably, STED-ICCS was able to detect not only a value  
323 of colocalized fraction but also the characteristic correlation distance associated to correlated  
324 nuclear sites. In particular, PCNA was found in close association with EdU-labeled replication  
325 foci, with a detected distance of ~50 nm, very close to the experimental limit of the analysis. On  
326 the other hand, transcription foci were found at a distance of 130 nm from EdU-labeled  
327 replication foci, indicating a spatial segregation at the nanoscale despite both transcription and  
328 replication taking place on the same portion on the genome during the early S phase of the cell  
329 cycle. Overall, there was a good agreement between STED-ICCS and the object-based analysis,  
330 demonstrating that, even without requiring a pre-segmentation, STED-ICCS can provide some of  
331 the most attractive features of an object-based analysis.

332 An important point to discuss is how general is the applicability of our method. We have shown  
333 experimental data obtained on model and fixed biological samples by dual color STED imaging.  
334 In particular, in the conditions of our experiments, we achieved a lateral resolution in the order  
335 of ~100 nm. The same type of nanoscale ICCS analysis could be applied to other types of ‘static’  
336 superresolution images, including images obtained with SMLM. In the case of SMLM, a  
337 segmentation of the data is already available making object-based co-localization analysis the  
338 method of choice. Nevertheless, we believe that the ICCS analysis could be useful as an  
339 independent cross-validation of the results obtained with object-based approaches. Even more  
340 interesting appears the application of our method to the analysis of ‘dynamic’ superresolution  
341 images, for which an object-based analysis is less straightforward. In our data, a spatial  
342 resolution of the order of ~100 nm was sufficient to characterize the relative nanoscale spatial  
343 distribution of the three pairs of functional nuclear sites investigated in our samples. The same  
344 spatial resolution could be achieved, in principle, with many live-cell superresolution imaging  
345 approaches. For instance, Structured illumination Microscopy (SIM), and its point-scanning  
346 equivalent Image Scanning Microscopy (ISM), are superresolution techniques compatible with  
347 live cell imaging, even if their resolution improvement is limited to a factor of ~2 (12). The same  
348 STED nanoscopy includes several variants developed to reduce the STED beam intensity and its  
349 potentially photo-damaging effects (40, 52, 53). Thus, we expect that our ICCS formalism could  
350 be applied to live cell super-resolved images obtained, for instance, by dual color STED- or  
351 SIM-based setups. In this perspective, we believe that our work could be useful to establish, in  
352 the near future, a new type of dynamic analyses that cannot be obtained in other static  
353 superresolution techniques.

354

## 355 **Materials and Methods**

356 *Cell culture*



357 Human mammary epithelial cells MCF10A were grown in DMEM (Merck KGaA, Darmstadt,  
358 Germany):Ham's F12K (Thermofisher Scientific, Waltham, MA, USA) medium (1:1) containing  
359 5% horse serum, 1% penicillin/streptomycin, 2 mM L-glutamine, 10 µg/mL insulin, 0.5 µg/mL  
360 hydrocortisone, 50 ng/mL cholera toxin (all from Merck KGaA) and 20 ng/mL EGF (PeproTech,  
361 Rocky Hill, NJ, USA), at 37 °C in 5% CO<sub>2</sub>. For fluorescence microscopy measurements, cells were  
362 seeded on glass coverslips coated with 0.5% (w/v) gelatin (Sigma Chemical Co.) and cultured for  
363 18h in growth medium. Cells were incubated for 20 min with the synthetic nucleotides 5-ethynyl-2'-  
364 deoxyuridine 10 µM, EdU (Thermofisher Scientific) and 5-Bromouridine 10 mM, BrU (Sigma  
365 Chemical Co.) to allow labelling of replication and transcription, respectively. Upon nucleotide  
366 incorporation, cells were washed with PBS and fixed with 4% paraformaldehyde (w/v) for 10 min  
367 at room temperature.

#### 368 *Sample preparation*

369 For immunostaining, MCF10A cells were permeabilized with 0.1% (v/v) Triton X-100 in blocking  
370 bugger (BB), composed of 5% w/v bovine serum albumin (BSA) in PBS, for 1h at room  
371 temperature. To recognize nascent DNA (transcription) and RNA (replication) filaments,  
372 incorporated BrU and EdU were labeled, respectively. For BrU detection, cells were incubated  
373 overnight at 4 °C with a primary rabbit antibody anti-BrdU (Rockland Immunochemicals Inc.,  
374 Limerick, PA, USA) diluted at 1:1000 in BB, followed by three 15 min rinses in BB. EdU  
375 incorporation was detected using the Click-iT EdU imaging kit (Thermo Fisher Scientific)  
376 according to the manufacturer instructions but replacing the kit's azide-Alexa488 with Azide-  
377 PEG3-biotin-conjugated (Merck) at a 1:500 dilution to allow the subsequent immunostaining. After  
378 the click reaction, cells were washed with PBS and incubated with the primary mouse antibody anti-  
379 biotin (Merck) diluted at 1:1000 in BB, for 1h at room temperature. To detect PCNA and EdU,  
380 incorporated EDU nucleotides were conjugated with biotin-azide using the Click-iT EdU imaging  
381 kit as previously described. Samples were then incubated with primary antibodies anti-biotin  
382 (1:1000 dilution in BB) and anti-PCNA in rabbit IgG (Santa Cruz Biotechnology Inc. Dallas, Texas,

383 USA) (1:500 dilution in BB) at the same time for 1h at room temperature. To detect  
384 transcriptionally active and repressed chromatin, we labeled BrU and Histone 3 lysine 9 tri-  
385 methylated (H3K9me3), respectively. The cells were simultaneously incubated with primary  
386 antibody anti-BrdU as previously described and anti-H3K9me3 in mouse IgG (Abcam, Cambridge,  
387 UK) at a 1:800 dilution, overnight at 4 °C in BB.

388 After three 15 min rinses in BB, cells were incubated with secondary antibodies (1:200 dilution)  
389 for 1h at room temperature in BB, upon which cells were washed with BB three times for 15 min.  
390 The secondary antibodies were Atto532 and Chromeo488 conjugated with goat anti-mouse IgG  
391 (Rockland Immunochemicals Inc.) and anti-rabbit IgG (Abcam, Cambridge, UK), respectively. All  
392 samples were washed with PBS and water before mounting with Mowiol (Sigma).

393 DNA origami structures containing the two fluorophores Chromeo488 and Atto532 at a well-  
394 defined distance of either  $d=20$  nm or  $d=100$  nm were purchased from GATTAquant (custom  
395 nanorulers, GATTAquant, Germany).

### 396 *Experiments*

397 All imaging experiments were performed on a Leica TCS SP5 gated-STED microscope, using an  
398 HCX PL APO 100x 100/1.40/0.70 Oil immersion objective lens (Leica Microsystems,  
399 Mannheim, Germany). Emission depletion was accomplished with a 592 nm STED laser.

400 Excitation was provided by a white laser at the desired wavelength for each sample. For imaging  
401 of MCF10A nuclei, Chromeo488 was excited at 470 nm and its fluorescence emission detected  
402 at 480-530 nm, with 1-10 ns time gating using a Hybrid detector (Leica Microsystem). Atto532  
403 excitation was performed at 532 nm and the emission collected between 545-580 nm by a Hybrid  
404 detector, with time gating of 2.5-6 ns. The two channels were acquired in line-sequential mode  
405 and the excitation and depletion power were adjusted separately for each channel. 512×512 pixel  
406 images were acquired with a pixel size of 40 nm. Similar settings were used for imaging the 100  
407 nm and 20 nm nanorulers.

## 408 *Simulations*

409 Dual color images of nuclear foci were simulated using MATLAB. For each channel, the object  
410 consisted in a variable number  $N$  of point-like emitters distributed randomly inside a circular  
411 area with a diameter of  $16\ \mu\text{m}$  (40). The images were made by  $512 \times 512$  pixels with a pixel size  
412 of  $40\ \text{nm}$ . The maximum total number of photons detected from a single pixel position from a  
413 single particle was set to  $S=40$ . For each channel, the object was convolved with a gaussian Point  
414 Spread Function (PSF) with Full Width Half Maximum (FWHM) of  $120\ \text{nm}$  and a uniform  
415 background level  $B=3$  was added within the circular region. Finally, the resulting images were  
416 corrupted by Poisson noise. To simulate the uncorrelated sample, the foci were distributed  
417 randomly in both channels. To simulate a partially colocalized sample, a number  $N/4$  of foci in  
418 the second channel was set to have the same coordinates of  $N/4$  foci in the first channel. To  
419 simulate the sample colocalized in a zone, the colocalized foci were forced to be in a specific  
420 quarter of the circular area. The total number of foci in each channel was varied from  $N=100$  to  
421  $N=10000$ .

## 422 *Image cross-correlation spectroscopy (ICCS) and local ICCS*

423 The ICCS analysis was performed in MATLAB using a custom code. The 2D image correlation  
424 functions were calculated as:

$$425 \quad G_{ij}(\delta_x, \delta_y) = \frac{\langle I_i(x,y)I_j(x+\delta_x,y+\delta_y) \rangle}{\langle I_i(x,y) \rangle \langle I_j(x,y) \rangle} - 1 \quad (1)$$

426 where  $I_1(x,y)$  and  $I_2(x,y)$  are the images in the first and the second channel, respectively, and the  
427 angle brackets indicate averaging over all the selected pixels of the image. The two autocorrelation  
428 functions were obtained by setting  $i=j=1$  and  $i=j=2$ , respectively, whereas the cross-correlation  
429 function was obtained by setting  $i=1$  and  $j=2$ . The numerator in Eq.(1) was calculated by a 2D-FFT  
430 (Fast Fourier Transform) algorithm. Before calculation, a Region of Interest (ROI) corresponding to  
431 the nucleus was defined and all the pixels outside this ROI were assigned an intensity value equal to

432 the average value inside ROI, as reported previously (41). This step is useful to minimize the effects  
433 of nuclear borders on the correlation functions.

434 The 2D correlation functions were then converted into radial 1D correlation functions  $G_{ij}(\delta_r)$  by  
435 performing an angular mean, as described previously (44). The resulting radial correlation functions  
436 were then fitted to a gaussian model:

$$437 \quad G_{ij}(\delta_r) = G_{\infty} + G_{ij}(0) \exp(-\delta_r^2/w_{ij}^2) \quad (2)$$

438 in order to extract the amplitude parameters  $G_{ij}(0)$  and the width parameters  $w_{ij}$ .

439 The amplitude parameters were used to calculate the coefficients of colocalizations  $M_1$  and  $M_2$  (36):

$$440 \quad M_1 = G_{12}(0)/G_{22}(0) \quad (3)$$

$$441 \quad M_2 = G_{12}(0)/G_{11}(0) \quad (4)$$

442 The colocalized fraction  $f_{\text{ICCS}}$  was then calculated as the arithmetic mean of the two coefficients

443  $M_1$  and  $M_2$ . The broadening of the cross-correlation function with respect to the corresponding

444 auto-correlation function has been evaluated with the parameter  $\Delta w = w_{12} - w_{\text{cc}}$ , where

$$445 \quad w_{\text{cc}} = ((w_{11}^2 + w_{22}^2)/2)^{1/2}.$$

446 To discard bad cross-correlation function fits, we excluded i) fits with a chi-square value 50

447 times larger than the chi-square value of the auto-correlation function fit; ii) fits with a width  $w_{12}$

448 too different compared to the average autocorrelation function widths ( $r_w < 0.5$  or  $r_w > 2$ , where

449  $r_w = w_{12}/(w_{11}w_{22})^{1/2}$ ); iii) fits with a negative offset  $G_{\infty}$  ( $G_{\infty} < -0.2 G_{12}(0)$ ). In all these cases, we set

450  $f_{\text{ICCS}} = 0$ .

451 The local ICCS analysis consisted in performing ICCS iteratively on small, 69×69 pixels wide,

452 sub-regions of the full-size image. For each sub-region, the local auto- and cross-correlation

453 function were calculated and the parameters  $G_{ij}(0)$ ,  $w_{ij}$  and  $f_{\text{ICCS}}$  were extracted as described for

454 ICCS analysis. In addition to the conditions described above, we excluded local auto-correlation

455 fits with an amplitude 10-times larger than the amplitude of the global autocorrelation function

456 and local cross-correlation fits with an amplitude 2-times larger than the amplitude of the local

457 autocorrelation function. The calculation was limited to  $N_{\text{samp}} = 100$  sampling sub-regions

458 centered on  $N_{\text{samp}}$  pixels uniformly distributed over the image. Then the resulting values were  
459 interpolated to produce a map of the same size of the full-size image.

#### 460 *Object-based analysis and relative distance distribution (RDD)*

461 The central coordinates of the foci in each channel were obtained using the JaCoP plugin (54) in  
462 ImageJ (55). For each channel, an intensity threshold was set manually. The minimum size of the  
463 particles was set to 2 pixels. The algorithm provided the coordinates of all the localized particles  
464 in each channel and the values of distance from each particle in the first channel from all the  
465 particles in the second channel. In the simulations, particles were considered colocalized if their  
466 distance was lower than 50 nm. In the biological samples, particles were considered colocalized  
467 if their distance was lower than 140 nm. All the values of distance were used to build the relative  
468 distance distribution (RDD) histogram. To estimate the random component in the cumulative  
469 RDD histogram, a linear fit of the data through the origin was performed in the range 250-  
470 500 nm. This linear component was then subtracted from the data to obtain a RDD without the  
471 random component.

472

473 **Author Contributions.** LL, AD, EG, MF, GID, PGP designed research; MO, LS, MJS, LF, PB  
474 performed research; LL and LS wrote software; LL, MO, LS, MJS, IC, SP analyzed data; LL wrote  
475 the paper with input from all the authors.

476 **Acknowledgements.** LL, MO and MJS were supported by Fondazione Cariplo and Associazione  
477 Italiana per la Ricerca sul Cancro (AIRC) through Trideo (Transforming Ideas in Oncological  
478 Research) Grant number 17215. The research leading to these results has also received funding  
479 from AIRC under MFAG 2018 - ID. 21931 project – P.I. Lanzaò Luca.

480

481

## 482 **References**

- 483 1. Misteli, T. 2010. Higher-order genome organization in human disease. *Cold Spring Harb Perspect Biol* 2:a000794.
- 484
- 485 2. Wei, X., J. Samarabandu, R. S. Devdhar, A. J. Siegel, R. Acharya, and R. Berezney. 1998. Segregation  
486 of transcription and replication sites into higher order domains. *Science* 281:1502-1506.
- 487 3. Garcia-Muse, T., and A. Aguilera. 2016. Transcription-replication conflicts: how they occur and how  
488 they are resolved. *Nat Rev Mol Cell Biol* 17:553-563.
- 489 4. Dellino, G. I., and P. G. Pelicci. 2014. Next-generation sequencing and DNA replication in human  
490 cells: the future has arrived. *Future Oncol* 10:683-693.
- 491 5. Macheret, M., and T. D. Halazonetis. 2018. Intragenic origins due to short G1 phases underlie  
492 oncogene-induced DNA replication stress. *Nature* 555:112-116.
- 493 6. Bintu, B., L. J. Mateo, J. H. Su, N. A. Sinnott-Armstrong, M. Parker, S. Kinrot, K. Yamaya, A. N.  
494 Boettiger, and X. Zhuang. 2018. Super-resolution chromatin tracing reveals domains and  
495 cooperative interactions in single cells. *Science* 362.
- 496 7. Giral, H., L. Lanzano, Y. Caldas, J. Blaine, J. W. Verlander, T. Lei, E. Gratton, and M. Levi. 2011. Role  
497 of PDZK1 protein in apical membrane expression of renal sodium-coupled phosphate transporters.  
498 *J Biol Chem* 286:15032-15042.
- 499 8. Sekar, R. B., and A. Periasamy. 2003. Fluorescence resonance energy transfer (FRET) microscopy  
500 imaging of live cell protein localizations. *J Cell Biol* 160:629-633.
- 501 9. Pelicci, S., A. Diaspro, and L. Lanzano. 2019. Chromatin nanoscale compaction in live cells visualized  
502 by acceptor-to-donor ratio corrected Forster resonance energy transfer between DNA dyes. *J*  
503 *Biophotonics*:e201900164.
- 504 10. Furia, L., P. G. Pelicci, and M. Faretta. 2013. A computational platform for robotized fluorescence  
505 microscopy (II): DNA damage, replication, checkpoint activation, and cell cycle progression by high-  
506 content high-resolution multiparameter image-cytometry. *Cytometry A* 83:344-355.
- 507 11. Lonn, P., and U. Landegren. 2017. Close Encounters - Probing Proximal Proteins in Live or Fixed  
508 Cells. *Trends Biochem Sci* 42:504-515.
- 509 12. Schermelleh, L., A. Ferrand, T. Huser, C. Eggeling, M. Sauer, O. Biehlmaier, and G. P. C. Drummen.  
510 2019. Super-resolution microscopy demystified. *Nat Cell Biol* 21:72-84.
- 511 13. Betzig, E., G. H. Patterson, R. Sougrat, O. W. Lindwasser, S. Olenych, J. S. Bonifacino, M. W.  
512 Davidson, J. Lippincott-Schwartz, and H. F. Hess. 2006. Imaging intracellular fluorescent proteins at  
513 nanometer resolution. *Science* 313:1642-1645.
- 514 14. Hess, S. T., T. P. Girirajan, and M. D. Mason. 2006. Ultra-high resolution imaging by fluorescence  
515 photoactivation localization microscopy. *Biophys J* 91:4258-4272.
- 516 15. Rust, M. J., M. Bates, and X. Zhuang. 2006. Sub-diffraction-limit imaging by stochastic optical  
517 reconstruction microscopy (STORM). *Nature methods* 3:793-795.
- 518 16. Hell, S. W., and J. Wichmann. 1994. Breaking the diffraction resolution limit by stimulated emission:  
519 stimulated-emission-depletion fluorescence microscopy. *Opt Lett* 19:780-782.
- 520 17. Arena, E. T., C. T. Rueden, M. C. Hiner, S. Wang, M. Yuan, and K. W. Eliceiri. 2017. Quantitating the  
521 cell: turning images into numbers with ImageJ. *Wiley Interdiscip Rev Dev Biol* 6.
- 522 18. Lagache, T., N. Sauvonnnet, L. Danglot, and J. C. Olivo-Marin. 2015. Statistical analysis of molecule  
523 colocalization in bioimaging. *Cytometry A* 87:568-579.
- 524 19. Andronov, L., I. Orlov, Y. Lutz, J. L. Vonesch, and B. P. Klaholz. 2016. ClusterViSu, a method for  
525 clustering of protein complexes by Voronoi tessellation in super-resolution microscopy. *Sci Rep*  
526 6:24084.
- 527 20. Caetano, F. A., B. S. Dirk, J. H. Tam, P. C. Cavanagh, M. Goiko, S. S. Ferguson, S. H. Pasternak, J. D.  
528 Dikeakos, J. R. de Bruyn, and B. Heit. 2015. MliSR: Molecular Interactions in Super-Resolution  
529 Imaging Enables the Analysis of Protein Interactions, Dynamics and Formation of Multi-protein  
530 Structures. *PLoS Comput Biol* 11:e1004634.
- 531 21. Rossy, J., E. Cohen, K. Gaus, and D. M. Owen. 2014. Method for co-cluster analysis in multichannel  
532 single-molecule localisation data. *Histochem Cell Biol* 141:605-612.

- 533 22. Xu, J., H. Ma, J. Jin, S. Uttam, R. Fu, Y. Huang, and Y. Liu. 2018. Super-Resolution Imaging of Higher-  
534 Order Chromatin Structures at Different Epigenomic States in Single Mammalian Cells. *Cell Rep*  
535 24:873-882.
- 536 23. Levet, F., G. Julien, R. Galland, C. Butler, A. Beghin, A. Chazeau, P. Hoess, J. Ries, G. Giannone, and J.  
537 B. Sibarita. 2019. A tessellation-based colocalization analysis approach for single-molecule  
538 localization microscopy. *Nat Commun* 10:2379.
- 539 24. Adler, J., and I. Parmryd. 2010. Quantifying colocalization by correlation: the Pearson correlation  
540 coefficient is superior to the Mander's overlap coefficient. *Cytometry A* 77:733-742.
- 541 25. MANDERS, E. M. M., F. J. VERBEEK, and J. A. ATEN. 1993. Measurement of co-localization of objects  
542 in dual-colour confocal images. *Journal of Microscopy* 169:375-382.
- 543 26. Galiani, S., D. Waithe, K. Reglinski, L. D. Cruz-Zaragoza, E. Garcia, M. P. Clausen, W. Schliebs, R.  
544 Erdmann, and C. Eggeling. 2016. Super-resolution Microscopy Reveals Compartmentalization of  
545 Peroxisomal Membrane Proteins. *J Biol Chem* 291:16948-16962.
- 546 27. Neumann, D., J. Buckers, L. Kastrop, S. W. Hell, and S. Jakobs. 2010. Two-color STED microscopy  
547 reveals different degrees of colocalization between hexokinase-I and the three human VDAC  
548 isoforms. *PMC Biophys* 3:4.
- 549 28. Reisinger, E., C. Bresee, J. Neef, R. Nair, K. Reuter, A. Bulankina, R. Nouvian, M. Koch, J. Buckers, L.  
550 Kastrop, I. Roux, C. Petit, S. W. Hell, N. Brose, J. S. Rhee, S. Kugler, J. V. Brigande, and T. Moser.  
551 2011. Probing the functional equivalence of otoferlin and synaptotagmin 1 in exocytosis. *J Neurosci*  
552 31:4886-4895.
- 553 29. Magde, D., E. Elson, and W. W. Webb. 1972. Thermodynamic Fluctuations in a Reacting System-  
554 Measurement by Fluorescence Correlation Spectroscopy. *Physical Review Letters* 29:705-708.
- 555 30. Bacia, K., and P. Schwille. 2007. Practical guidelines for dual-color fluorescence cross-correlation  
556 spectroscopy. *Nat Protoc* 2:2842-2856.
- 557 31. Foo, Y. H., N. Naredi-Rainer, D. C. Lamb, S. Ahmed, and T. Wohland. 2012. Factors affecting the  
558 quantification of biomolecular interactions by fluorescence cross-correlation spectroscopy. *Biophys*  
559 *J* 102:1174-1183.
- 560 32. Di Bona, M., M. A. Mancini, D. Mazza, G. Vicidomini, A. Diaspro, and L. Lanzano. 2019. Measuring  
561 Mobility in Chromatin by Intensity-Sorted FCS. *Biophys J* 116:987-999.
- 562 33. Wachsmuth, M., T. A. Knoch, and K. Rippe. 2016. Dynamic properties of independent chromatin  
563 domains measured by correlation spectroscopy in living cells. *Epigenetics Chromatin* 9:57.
- 564 34. Langowski, J. 2017. Single plane illumination microscopy as a tool for studying nucleome dynamics.  
565 *Methods* 123:3-10.
- 566 35. Wiseman, P. W. 2015. Image correlation spectroscopy: principles and applications. *Cold Spring Harb*  
567 *Protoc* 2015:336-348.
- 568 36. Comeau, J. W., S. Costantino, and P. W. Wiseman. 2006. A guide to accurate fluorescence  
569 microscopy colocalization measurements. *Biophys J* 91:4611-4622.
- 570 37. Digman, M. A., P. W. Wiseman, A. R. Horwitz, and E. Gratton. 2009. Detecting protein complexes in  
571 living cells from laser scanning confocal image sequences by the cross correlation raster image  
572 spectroscopy method. *Biophys J* 96:707-716.
- 573 38. Semrau, S., L. Holtzer, M. Gonzalez-Gaitan, and T. Schmidt. 2011. Quantification of biological  
574 interactions with particle image cross-correlation spectroscopy (PICCS). *Biophys J* 100:1810-1818.
- 575 39. Gao, X., P. Gao, B. Prunsche, K. Nienhaus, and G. U. Nienhaus. 2018. Pulsed interleaved excitation-  
576 based line-scanning spatial correlation spectroscopy (PIE-lsSCS). *Sci Rep* 8:16722.
- 577 40. Sarmiento, M. J., M. Oneto, S. Pelicci, L. Pesce, L. Scipioni, M. Faretta, L. Furia, G. I. Dellino, P. G.  
578 Pelicci, P. Bianchini, A. Diaspro, and L. Lanzano. 2018. Exploiting the tunability of stimulated  
579 emission depletion microscopy for super-resolution imaging of nuclear structures. *Nat Commun*  
580 9:3415.
- 581 41. Comeau, J. W., D. L. Kolin, and P. W. Wiseman. 2008. Accurate measurements of protein  
582 interactions in cells via improved spatial image cross-correlation spectroscopy. *Mol Biosyst* 4:672-  
583 685.
- 584 42. Wu, Y., M. Eghbali, J. Ou, R. Lu, L. Toro, and E. Stefani. 2010. Quantitative determination of spatial  
585 protein-protein correlations in fluorescence confocal microscopy. *Biophys J* 98:493-504.

- 586 43. Hebert, B., S. Costantino, and P. W. Wiseman. 2005. Spatiotemporal image correlation  
587 spectroscopy (STICS) theory, verification, and application to protein velocity mapping in living CHO  
588 cells. *Biophys J* 88:3601-3614.
- 589 44. Scipioni, L., E. Gratton, A. Diaspro, and L. Lanzano. 2016. Phasor Analysis of Local ICS Detects  
590 Heterogeneity in Size and Number of Intracellular Vesicles. *Biophys J* 111:619-629.
- 591 45. Scipioni, L., M. Di Bona, G. Vicidomini, A. Diaspro, and L. Lanzano. 2018. Local raster image  
592 correlation spectroscopy generates high-resolution intracellular diffusion maps. *Commun Biol* 1:10.
- 593 46. Hendrix, J., T. Dekens, W. Schrimpf, and D. C. Lamb. 2016. Arbitrary-Region Raster Image  
594 Correlation Spectroscopy. *Biophys J* 111:1785-1796.
- 595 47. Sancataldo, G., L. Scipioni, T. Ravasenga, L. Lanzanò, A. Diaspro, A. Barberis, and M. Duocastella.  
596 2017. Three-dimensional multiple-particle tracking with nanometric precision over tunable axial  
597 ranges. *Optica* 4:367-373.
- 598 48. Thompson, R. E., D. R. Larson, and W. W. Webb. 2002. Precise nanometer localization analysis for  
599 individual fluorescent probes. *Biophys J* 82:2775-2783.
- 600 49. Bannister, A. J., and T. Kouzarides. 2011. Regulation of chromatin by histone modifications. *Cell Res*  
601 21:381-395.
- 602 50. Choe, K. N., and G. L. Moldovan. 2017. Forging Ahead through Darkness: PCNA, Still the Principal  
603 Conductor at the Replication Fork. *Mol Cell* 65:380-392.
- 604 51. Malyavantham, K. S., S. Bhattacharya, W. D. Alonso, R. Acharya, and R. Berezney. 2008. Spatio-  
605 temporal dynamics of replication and transcription sites in the mammalian cell nucleus.  
606 *Chromosoma* 117:553-567.
- 607 52. Lanzano, L., I. Coto Hernandez, M. Castello, E. Gratton, A. Diaspro, and G. Vicidomini. 2015.  
608 Encoding and decoding spatio-temporal information for super-resolution microscopy. *Nat Commun*  
609 6:6701.
- 610 53. Vicidomini, G., G. Moneron, K. Y. Han, V. Westphal, H. Ta, M. Reuss, J. Engelhardt, C. Eggeling, and  
611 S. W. Hell. 2011. Sharper low-power STED nanoscopy by time gating. *Nature methods* 8:571-573.
- 612 54. Bolte, S., and F. P. Cordelieres. 2006. A guided tour into subcellular colocalization analysis in light  
613 microscopy. *J Microsc* 224:213-232.
- 614 55. Schneider, C. A., W. S. Rasband, and K. W. Eliceiri. 2012. NIH Image to ImageJ: 25 years of image  
615 analysis. *Nature methods* 9:671-675.

616

617



## 618 Figure Legends

619 **Fig.1 Comparison between STED-ICCS and object-based analysis on simulated data.** (a)  
620 Simulated dual color images of nuclear foci at low density (total number of foci,  $N=100$ ),  
621 assuming a random distribution of foci in each channel (uncorrelated), a 25% of foci  
622 colocalization in the two channels (colocalized) and a 25% of foci colocalizing only in a specific  
623 sub-portion of the image (colocalized in a zone), indicated by the dashed contour. The data were  
624 simulated with a PSF size of FWHM=120 nm. (b) Relative distance distributions (RDD)  
625 obtained by object-based analysis of the simulated images. (c) Simulated dual color images of  
626 nuclear foci at high density (total number of foci,  $N=2000$ ). (d) Spatial correlation functions of  
627 the images shown in (c). Shown are the cross-correlation function (black triangles) and the single  
628 channel auto-correlation functions (magenta dots and cyan squares) along with the corresponding  
629 fits (solid lines). (e) Local ICCS maps of the images shown in (c). The colormap represents the  
630 value of parameter  $f_{ICCS}$  calculated on a moving subregion of  $69 \times 69$  pixels. (f) Colocalized  
631 fraction extracted from object-based analysis of the simulated data as a function of the number of  
632 foci  $N$ . The dashed red line shows the trend for the colocalized sample when the PSF size is  
633 FWHM=250nm. (g) Colocalized fraction extracted by ICCS analysis of the simulated data as a  
634 function of the number of foci. (h) The value of  $f_{ICCS}$  extracted from the local ICCS map inside  
635 (in) and outside (out) the colocalization zone for the ‘colocalized in a zone’ sample, compared  
636 with the value of  $f_{ICCS}$  in the ‘colocalized’ sample.

637 **Fig.2 STED-ICCS of model samples.** (a,b) Schematic drawing and representative dual color  
638 STED images of the optical nanorulers. These model systems consist of Chromeo-488 and Atto-  
639 532 fluorophores located at a fixed distance of 20 nm (a) and 100 nm (b). The shaded circles  
640 schematically represent the PSF. Scale bar 1  $\mu\text{m}$ . (c,d) Object-based analysis for the 20-nm (c)  
641 and 100-nm (d) nanorulers. Shown are the relative distance distribution histograms (RDD)  
642 before (top) and after (bottom) subtraction of the uncorrelated random component. Solid red  
643 lines are Gaussian fits of the data ( $d_{20\text{nm}}=40 \pm 30$  nm,  $d_{100\text{nm}}=100 \pm 25$  nm, mean  $\pm$  s.d.). (e,f) Raw  
644 (top) and normalized (bottom) correlation functions of the representative images shown in (a,b).  
645 Shown are the cross-correlation function (black triangles) and the red (red square) and green  
646 (green circles) channel auto-correlation functions along with the corresponding fits (solid lines).  
647 (g) Colocalized fraction extracted from STED-ICCS analysis. (h) Cross-correlation function  
648 broadening obtained from STED-ICCS. (i) Values of distances determined by object-based  
649 analysis and STED-ICCS.

650 **Fig.3 Analysis of nuclear foci by STED-ICCS and object-based localization.** Analysis of  
651 representative STED images of MCF10A cells acquired upon labelling of (a) BrU (green) and  
652 H3K9me3 (red), (b) PCNA (green) and EdU (red), (c) BrU (green) and EdU (red). Shown are  
653 (from left to right) the dual color STED image, the positions of the colocalized (cyan) and non-  
654 colocalized (red and green) foci recovered by particle localization, the map of the colocalized  
655 fraction recovered by local ICCS, the RDD histogram and the spatial correlation functions  
656 recovered by ICCS. The ICCS plot shows the cross-correlation function (black triangles) and the  
657 red (red squares) and green (green circles) channel auto-correlation functions along with the  
658 corresponding fits (solid lines).

659 **Fig.4 Relative nanoscale spatial distribution of the investigated nuclear sites in MCF10A**  
660 **cells.** (a,b) Cumulative results of the object-based analysis. Shown are the relative distance  
661 distribution histograms (RDD) before (a) and after (b) subtraction of the uncorrelated random

662 component. Solid red lines are Gaussian fits of the data (PCNA-EdU:  $d=55\pm 34$  nm, mean $\pm$ s.d.,  
663  $n=19$  cells; BrU-EdU:  $d=100\pm 50$  nm, mean $\pm$ s.d.,  $n=22$  cells). The dashed red lines indicate the  
664 standard deviation of the data in the range 250-500 nm after subtraction of a linear fit of the  
665 uncorrelated component. (c,d) Cumulative results of the STED-ICCS analysis. (c) Colocalized  
666 fraction extracted from STED-ICCS analysis. (d) Cross-correlation function broadening  
667 extracted from STED-ICCS. (e) Values of distances extracted by object-based analysis and  
668 STED-ICCS for the correlated samples.

669

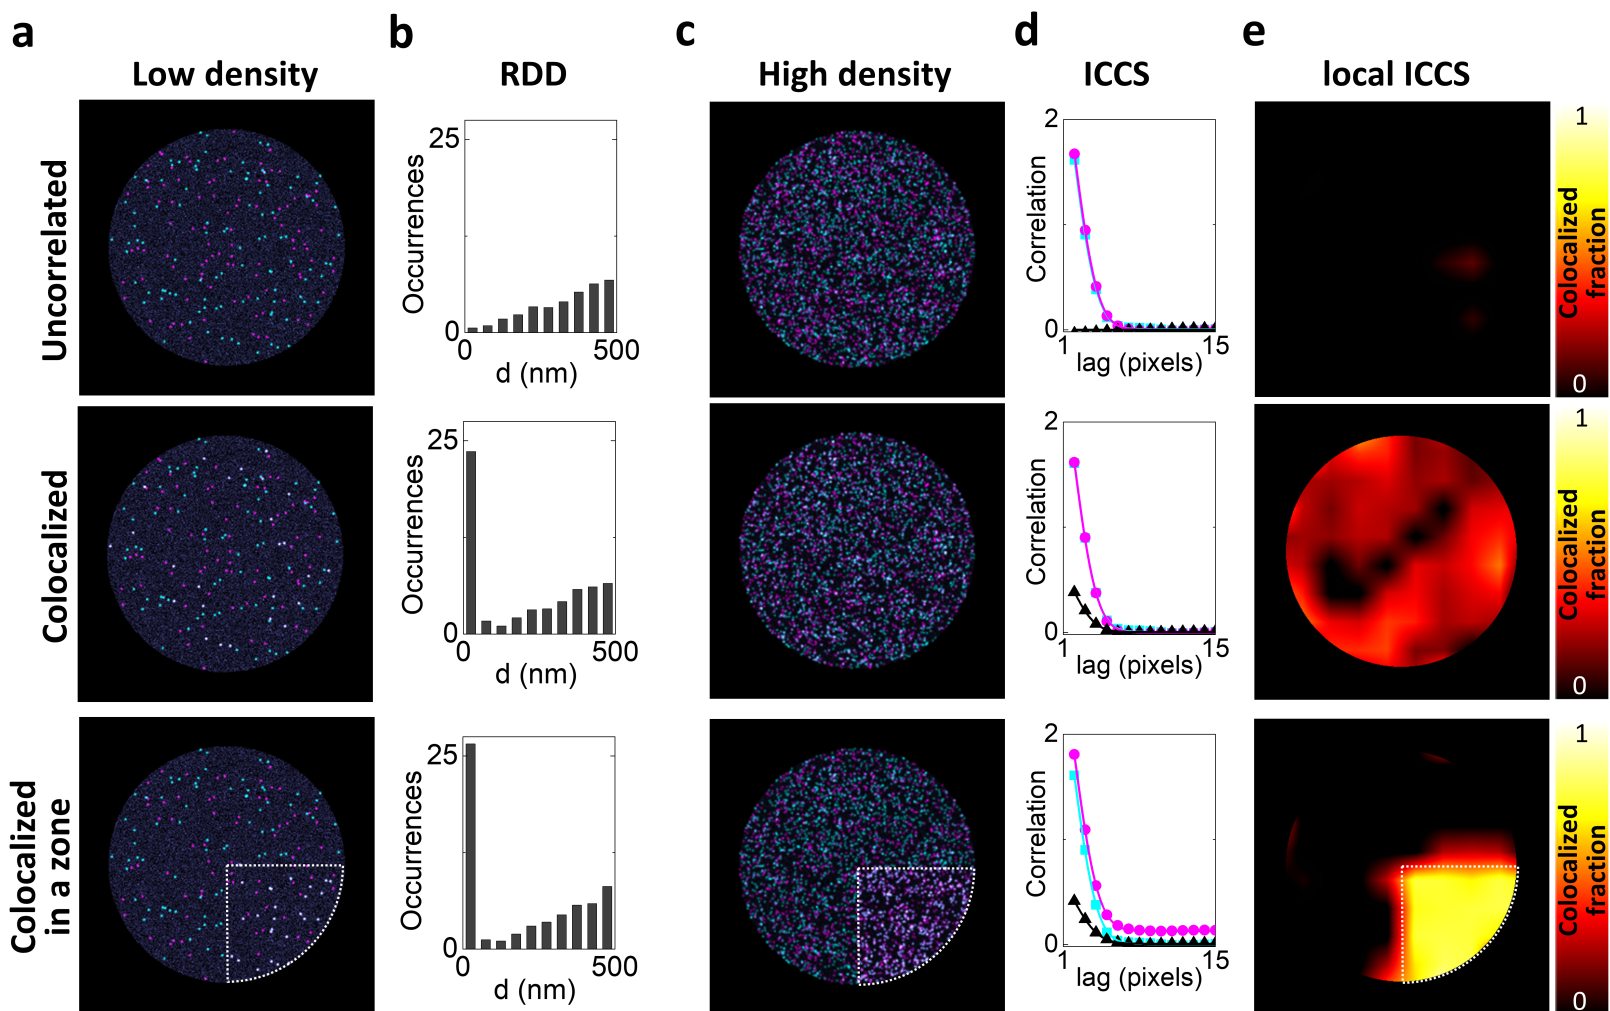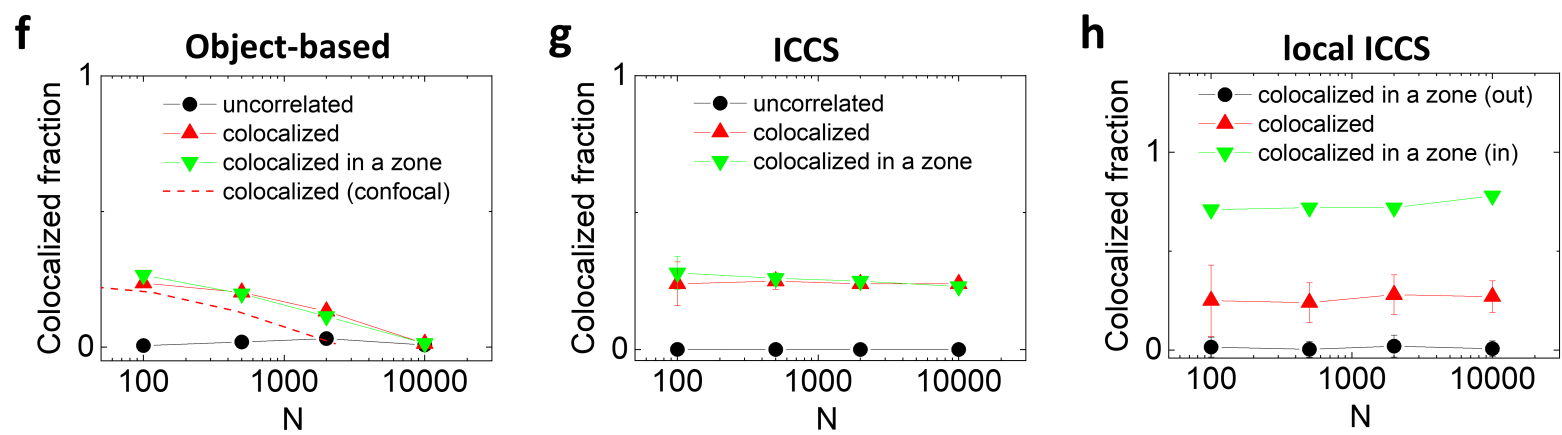

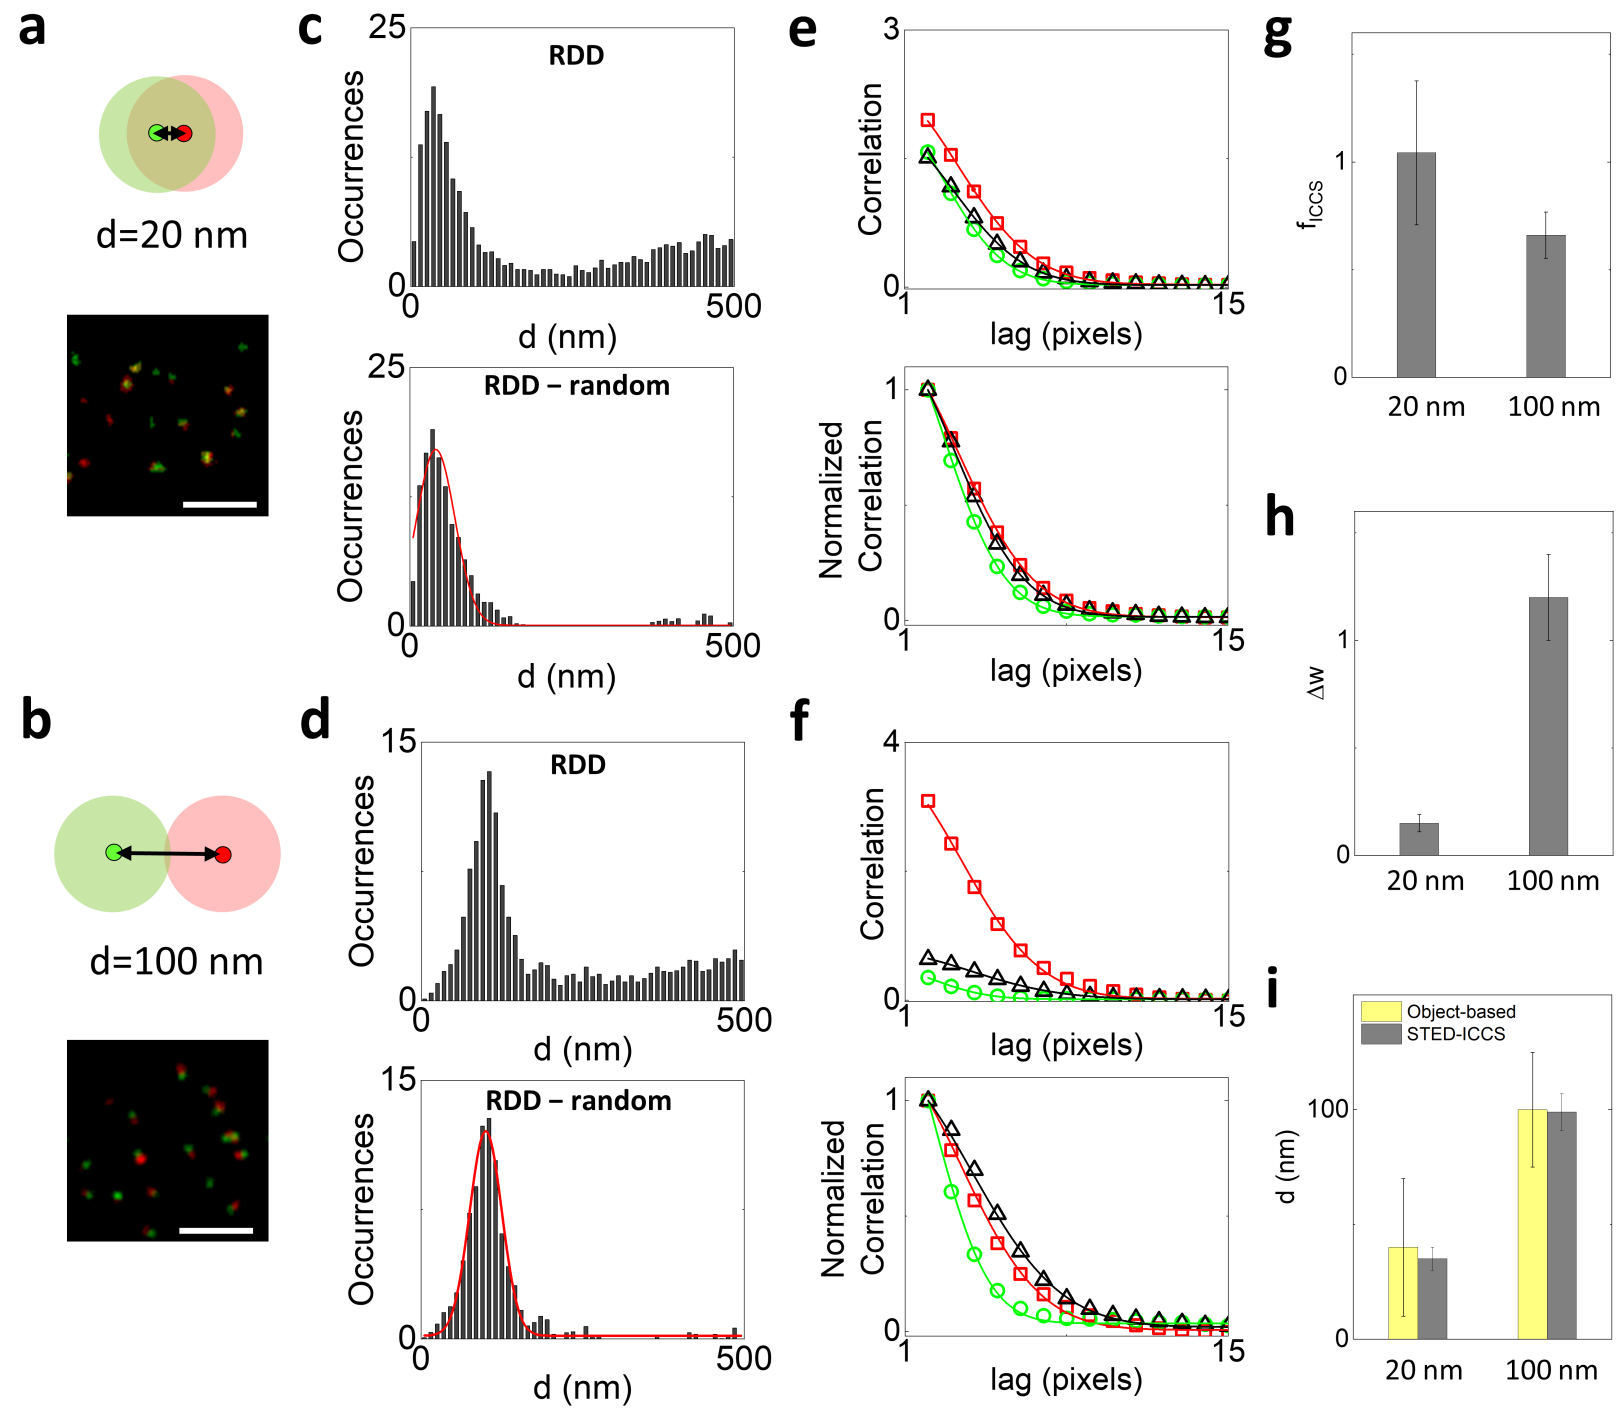

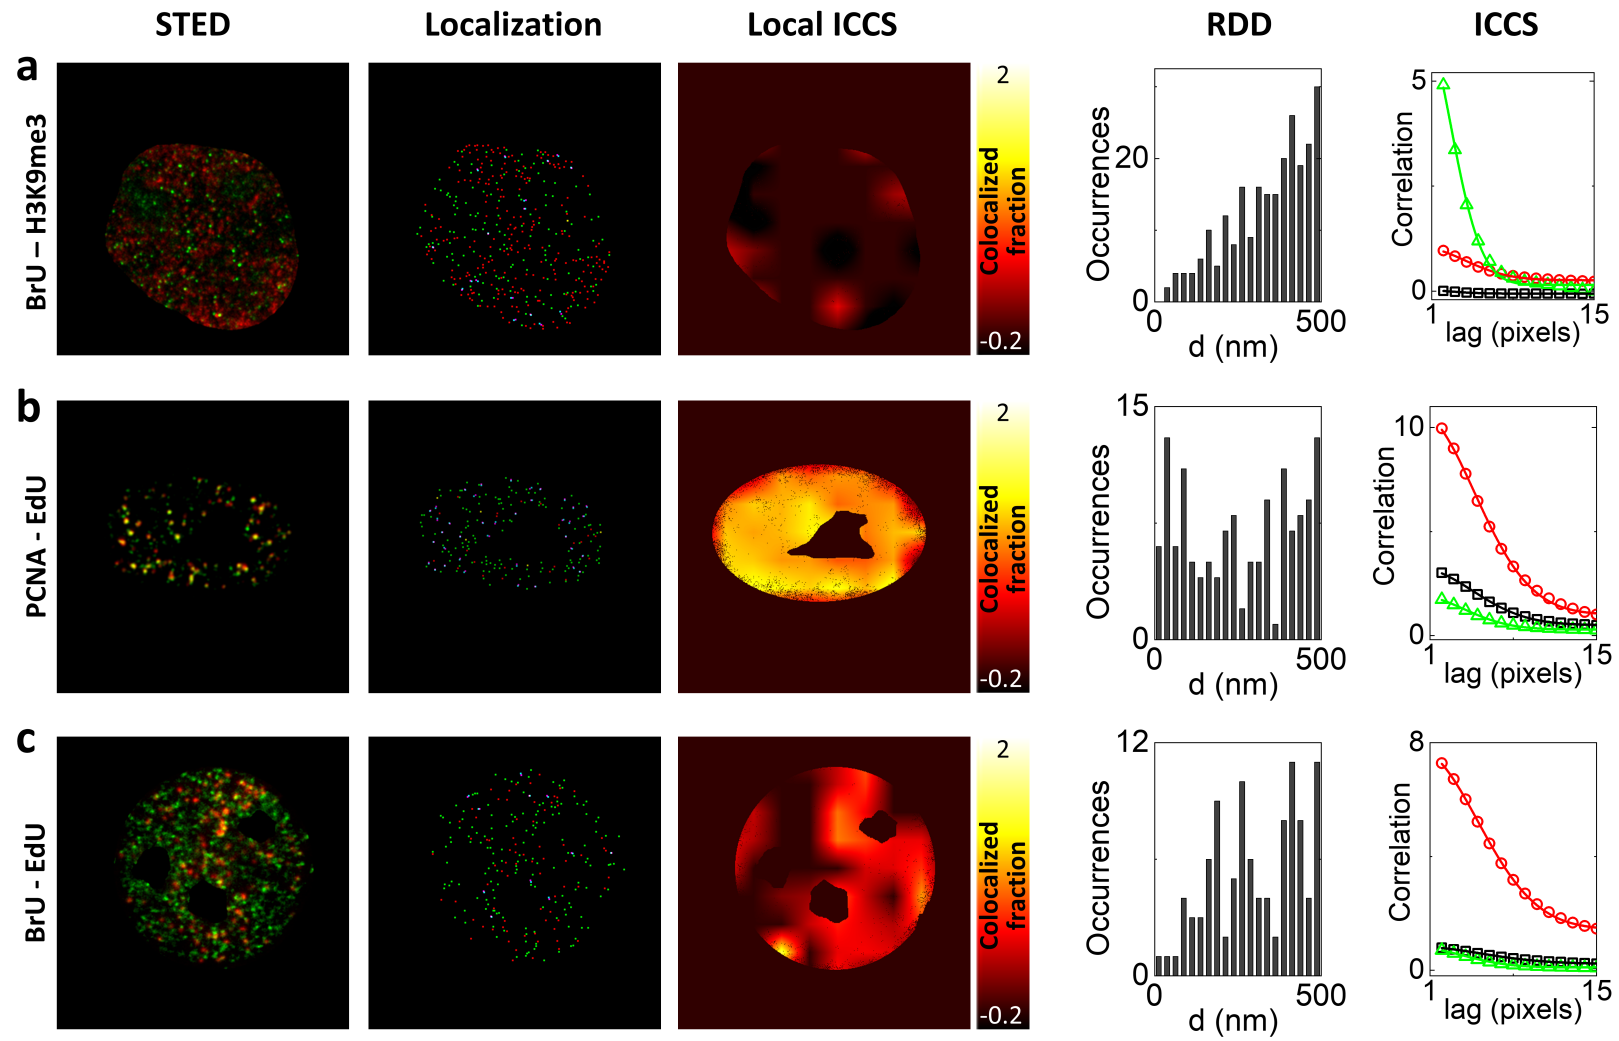

**a**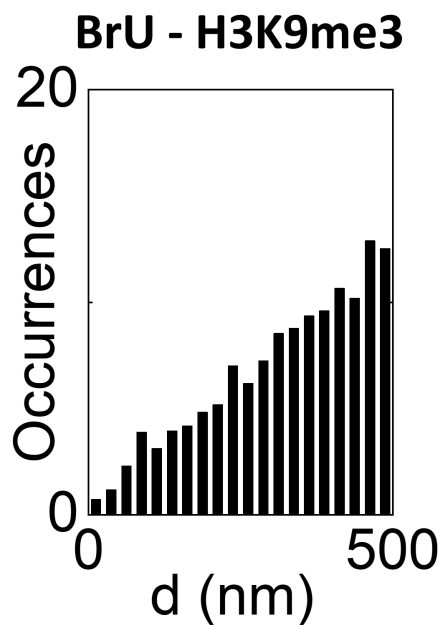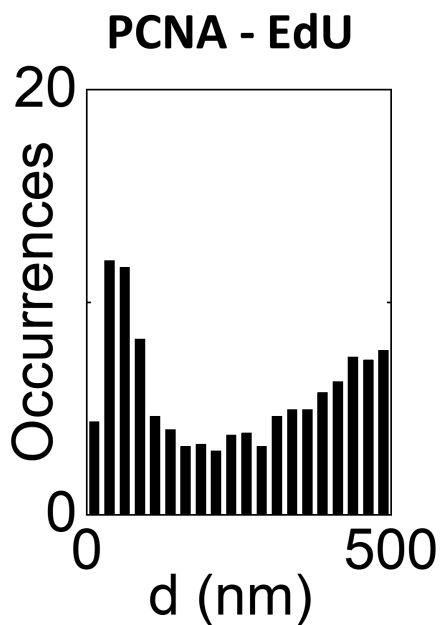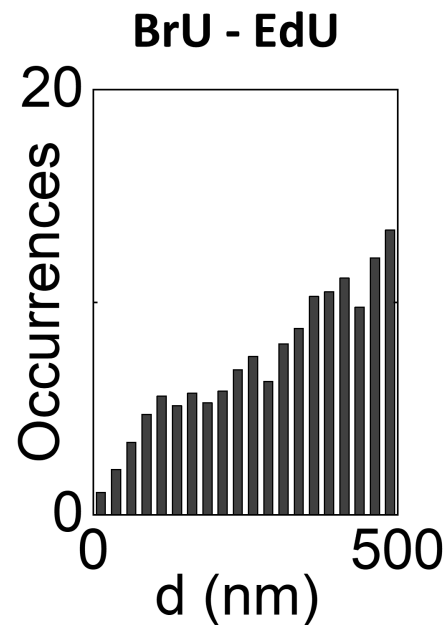**b**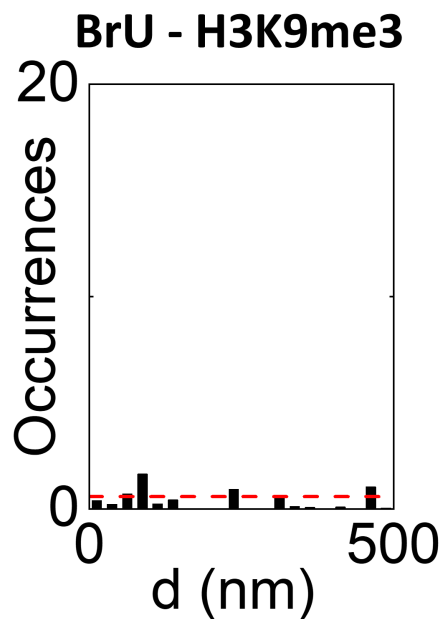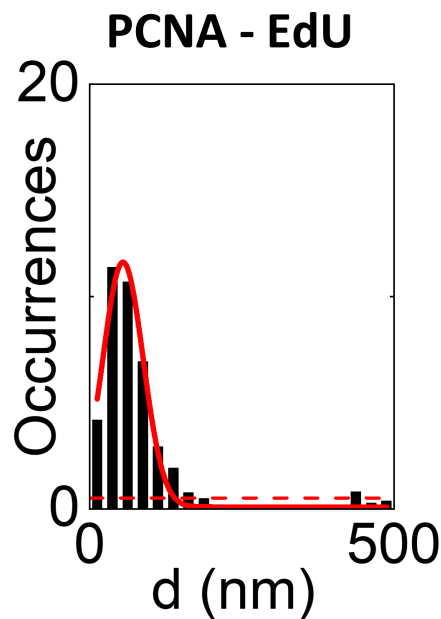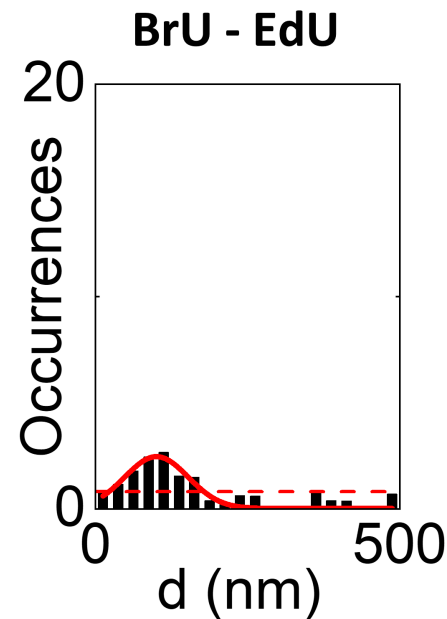**c**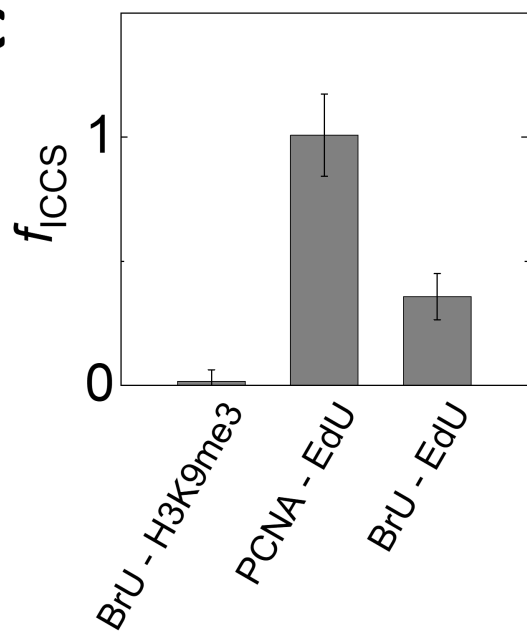**d**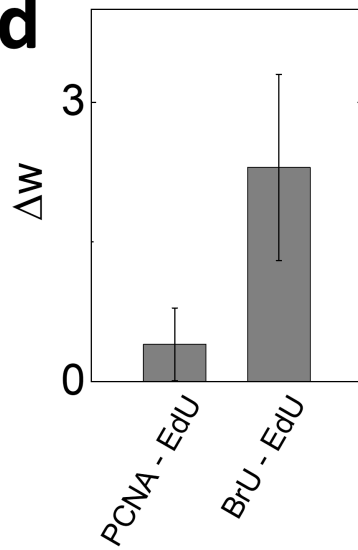**e**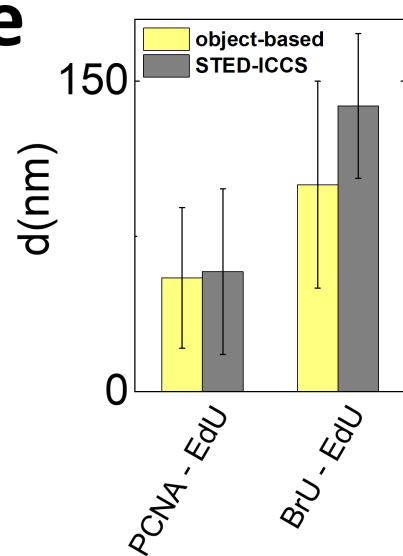

Source: https://www.biorxiv.org/content/10.1101/753228v1.full.pdf
